# Supplementary material for: Betulinic acid enhances TGF-β signaling by altering TGF-β receptors partitioning between lipid-raft/caveolae and non-caveolae membrane microdomains in mink lung epithelial cells
Source: PubMed Central journal article supplement (PMC4769553; doi:10.1186/s12929-016-0229-4), 2016-02-27

# Supplemental data, Figure S1

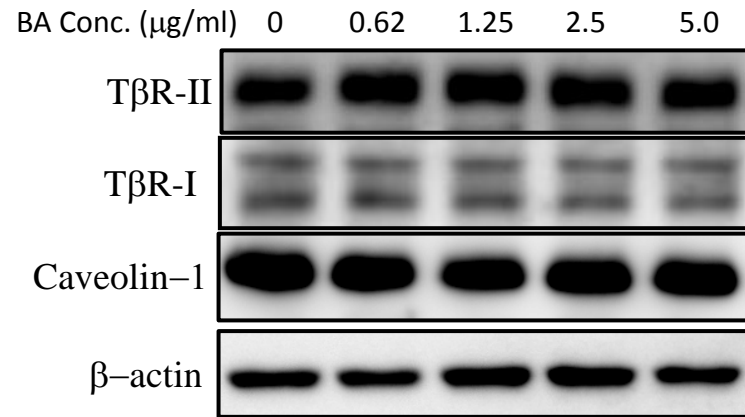

Supplemental data, Figure S2

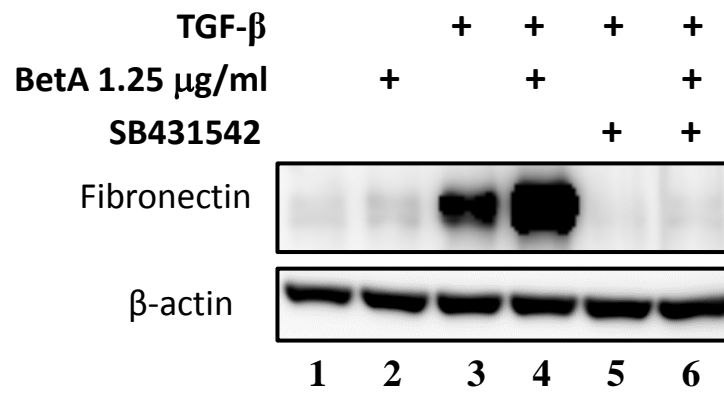

Supplement: 12929_2016_229_MOESM1_ESM.pdf [file 12929_2016_229_MOESM1_ESM.pdf]
